# Supplementary material for: Empowering the discovery of novel target-disease associations via machine learning approaches in the open targets platform
Source: PubMed Central journal article supplement (PMC9202116; doi:10.1186/s12859-022-04753-4), 2022-06-16

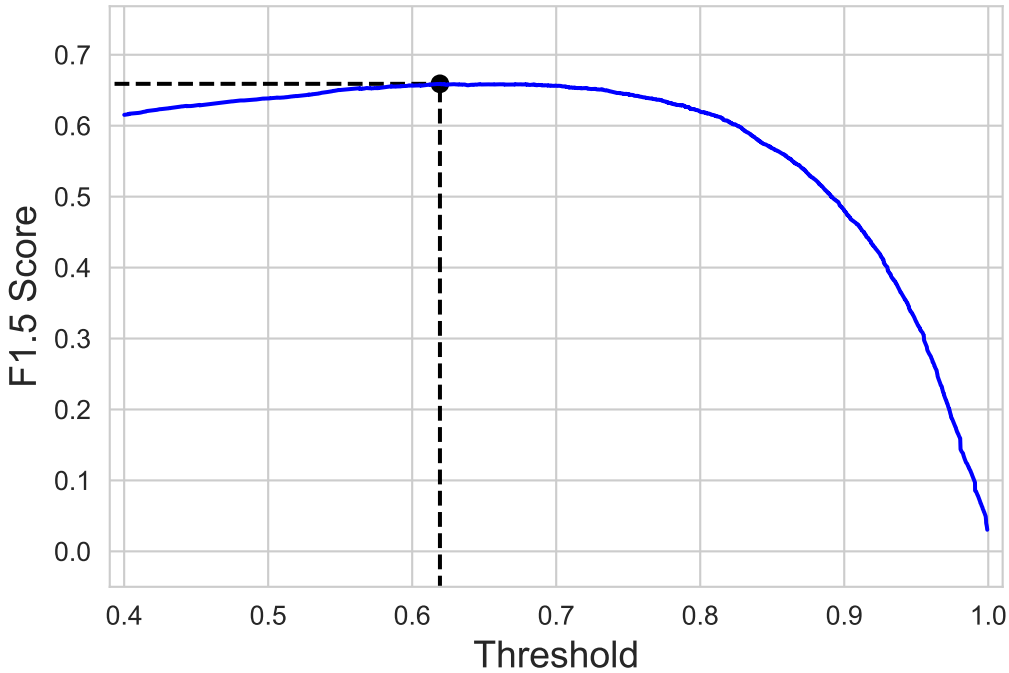

Supplement: 12859_2022_4753_MOESM3_ESM.pdf [file 12859_2022_4753_MOESM3_ESM.pdf]
