# Supplementary material for: Empowering the discovery of novel target-disease associations via machine learning approaches in the open targets platform
Source: PubMed Central journal article supplement (PMC9202116; doi:10.1186/s12859-022-04753-4), 2022-06-16
Supplement: 12859_2022_4753_MOESM4_ESM.pdf [file 12859_2022_4753_MOESM4_ESM.pdf]

**A**

|                                     | Cohen's Kappa | MCC   |
|-------------------------------------|---------------|-------|
| Cut-off = 0.78 (highest F1 score)   | 0.543         | 0.543 |
| Cut-off = 0.62 (highest F1.5 score) | 0.487         | 0.517 |

**B**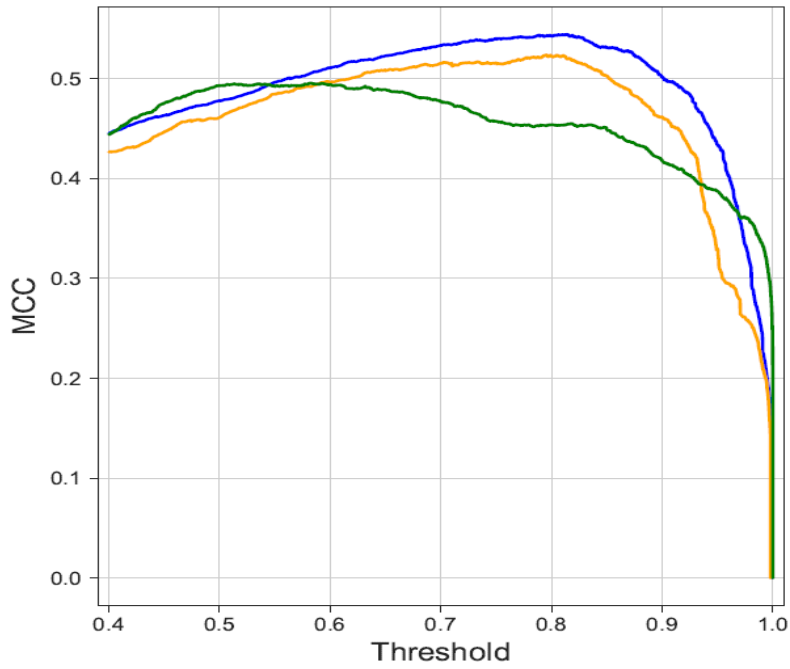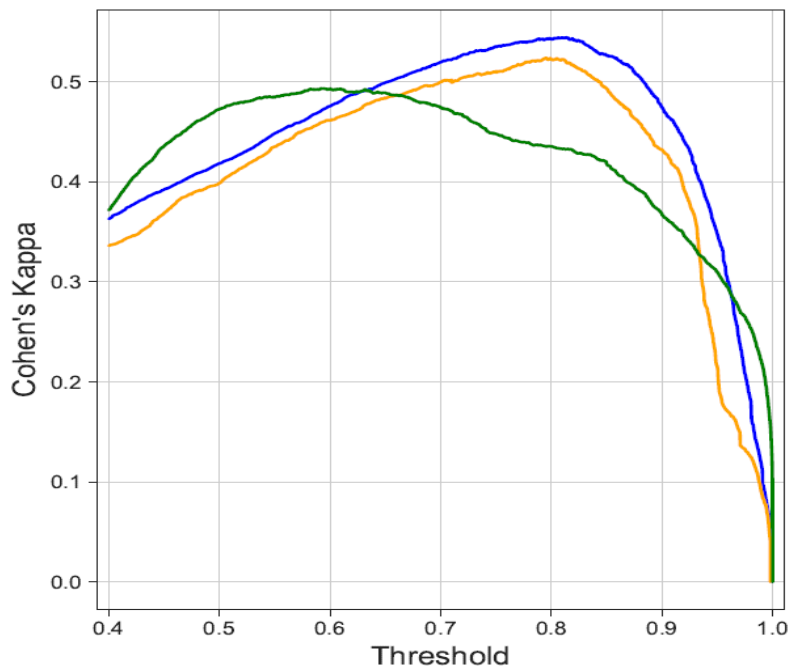

— XGBoost      — Random Forest      — Logistic Regression
